# Supplementary material for: Enhancing the Hydrolytic Activity of a Lipase towards Larger Triglycerides through Lid Domain Engineering
Source: Int J Mol Sci. 2023 Sep 6;24(18):13768. doi: 10.3390/ijms241813768 (PMC10530837; doi:10.3390/ijms241813768)
Supplement: Supplementary file 1 [file ijms-24-13768-s001.zip › Fernandez-Lopez_Supplementary Raw data.xlsx]

## Sheet: Figure 1A
Raw data for Figure 1A. Thermal characteristics of LipMRD. (A) Temperature profile. Effect of pH was determined following the hydrolysis of the model ester p-NP butyrate at 348 nm in 40 mM 4-(2-hydroxyethyl)-1-piperazineethanesulfonic acid (HEPES) buffer pH 7.0. All reactions were performed in triplicate (n = 3) with control reactions (no enzyme added) considered. The maximal activity was defined…
T (ºC)	Abs 348 nm (replica 1)	Abs 348 nm (replica 2)	Abs 348 nm (replica 13	STD	min assay	Abs CTR	Abs average-Abs CTR	Abs/min	SD		T (ºC)	Abs/min	SD	%	SD
5	3.345	3.38	3.3625	0.0247487	7	3.631	0.2685	0.0383571	0.00353553		5	0.0383571	0.00353553	3.87055	0.356764
10	3.114	3.199	3.1565	0.0601041	7	3.662	0.5055	0.0722143	0.0085863		10	0.0722143	0.0085863	7.28701	0.866428
15	2.68	2.801	2.7405	0.0855599	7	3.828	1.0875	0.155357	0.0122228		15	0.155357	0.0122228	15.6768	1.23339
20	2.942	2.869	2.9055	0.0516188	4	3.611	0.7055	0.176375	0.00737411		20	0.176375	0.00737411	17.7977	0.744108
25	2.902	2.773	2.8375	0.0912168	3	3.584	0.7465	0.248833	0.013031		25	0.248833	0.013031	25.1093	1.31493
30	2.443	2.623	2.533	0.127279	3	3.544	1.011	0.337	0.0181827		30	0.337	0.0181827	34.0061	1.83479
35	2.524	2.557	2.5405	0.0233345	2	3.458	0.9175	0.45875	0.0033335		35	0.45875	0.0033335	46.2916	0.336378
40	2.16	2.245	2.2025	0.0601041	2	3.429	1.2265	0.61325	0.0085863		40	0.61325	0.0085863	61.8819	0.866428
45	2.881	2.577	2.729	0.21496	1	3.72	0.991	0.991	0.0307086		45	0.991	0.0307086	100	3.09875
50	2.754	2.896	2.825	0.100409	1	3.648	0.823	0.823	0.0143442		50	0.823	0.0143442	83.0474	1.44744
55	3.171	3.208	3.1895	0.026163	1	3.581	0.3915	0.3915	0.00373756		55	0.3915	0.00373756	39.5055	0.377151
60	3.381	3.38	3.3805	0.000707107	3	3.482	0.1015	0.0338333	0.000101015		60	0.0338333	0.000101015	3.41406	0.0101933
65	3.449	3.414	3.4315	0.0247487	5	3.452	0.0205	0.0041	0.00353553		65	0.0041	0.00353553	0.413724	0.356764

## Sheet: Figure 1B
Raw data for Figure 1B. Thermal characteristics of LipMRD. (B) The thermal denaturation curve at pH 7.0, as determined by CD spectroscopy measuring the ellipticity changes at 220 nm obtained at different tem-peratures at a rate of 0.5 °C per min.
T (˚C)	CD[mdeg]
10	-23.5903
10.5	-23.9694
11	-23.7935
11.5	-24.5278
12	-24.9809
12.5	-24.4572
13	-24.9451
13.5	-24.0395
14	-24.4798
14.5	-24.9423
15	-24.6663
15.5	-24.5413
16	-23.9385
16.5	-23.7431
17	-24.4448
17.5	-24.7267
18	-24.8181
18.5	-24.1363
19	-24.5804
19.5	-24.4417
20	-23.5734
20.5	-24.1431
21	-24.2728
21.5	-24.1232
22	-23.8695
22.5	-24.6376
23	-23.7141
23.5	-23.9492
24	-23.8822
24.5	-24.616
25	-24.6715
25.5	-24.3321
26	-24.187
26.5	-24.2872
27	-23.8974
27.5	-24.8408
28	-24.7578
28.5	-23.5359
29	-24.1369
29.5	-24.3817
30	-24.4333
30.5	-23.8423
31	-24.2957
31.5	-23.9943
32	-24.5199
32.5	-24.4172
33	-24.0281
33.5	-23.5291
34	-23.5939
34.5	-23.449
35	-23.4852
35.5	-23.3803
36	-23.6004
36.5	-22.8277
37	-22.0936
37.5	-22.2822
38	-22.0818
38.5	-21.963
39	-22.1501
39.5	-22.0197
40	-22.1076
40.5	-22.5773
41	-22.0917
41.5	-22.3416
42	-22.4545
42.5	-21.9535
43	-22.264
43.5	-22.6243
44	-22.5705
44.5	-22.6593
45	-23.9701
45.5	-22.3882
46	-22.7873
46.5	-22.6339
47	-23.2263
47.5	-22.2984
48	-23.543
48.5	-23.496
49	-22.3656
49.5	-22.9356
50	-22.4624
50.5	-23.4623
51	-23.2657
51.5	-22.9756
52	-22.7212
52.5	-22.8566
53	-24.4761
53.5	-22.4126
54	-23.3215
54.5	-23.2692
55	-23.1572
55.5	-23.1053
56	-23.2648
56.5	-24.2053
57	-23.3773
57.5	-24.2503
58	-22.907
58.5	-23.589
59	-23.905
59.5	-23.6308
60	-22.8127
60.5	-24.0294
61	-22.8774
61.5	-23.8617
62	-23.2521
62.5	-23.3271
63	-23.4877
63.5	-23.9818
64	-23.4154
64.5	-23.5525
65	-23.6023
65.5	-24.612
66	-23.0425
66.5	-23.4291
67	-23.4334
67.5	-23.1228
68	-22.675
68.5	-24.4993
69	-23.1372
69.5	-23.161
70	-21.7707
70.5	-23.3806
71	-22.8317
71.5	-23.2656
72	-23.4363
72.5	-22.0595
73	-23.1019
73.5	-23.4984
74	-21.6559
74.5	-22.8114
75	-23.0924
75.5	-22.1875
76	-21.3701
76.5	-20.2572
77	-21.2432
77.5	-20.3104
78	-19.5361
78.5	-21.7542
79	-20.7124
79.5	-20.182
80	-19.7624
80.5	-18.0673
81	-17.4893
81.5	-15.8628
82	-15.2266
82.5	-13.3548
83	-12.9231
83.5	-11.8043
84	-10.5275
84.5	-9.63755
85	-9.44481
85.5	-10.1232
86	-10.8904
86.5	-9.25353
87	-9.01144
87.5	-7.58912
88	-7.41236
88.5	-7.02671
89	-6.38999
89.5	-6.77479
90	-6.51077
90.5	-6.66252
91	-4.95475
91.5	-6.75016
92	-6.85462
92.5	-6.91625
93	-5.59123
93.5	-5.82873
94	-4.68288

## Sheet: Figure 2
Raw data for Figure 2. Optimal pH for LipMRD lipase activity. Effect of pH was determined at 30 °C following the hydrolysis of the model ester p-NP butyrate at 348 nm in 50 mM Britton-Robinson (BR) buffer at pH 4.0–11. All reactions were performed in triplicate (n = 3) with control reactions (no enzyme added) considered. The maximal activity was defined as 100% (384.0±23.4 units/mg), and relative…
pH	Relative activity (%)	SD
4	0	0
5	16.8192	2.15675
6	42.1351	1.04757
7	52.9194	2.92702
7.5	80.8932	9.02755
8	88.7582	4.06702
8.5	97.7342	2.95783
9	100	6.10053
9.5	92.0044	7.97999
10	58.7364	8.99674
11	0	0

## Sheet: Table 1
Raw data for Table 1. Substrate specificity of enzyme variants investigated in this study. Specific activity (unit/g; mean ± SD of triplicates) for 7 model substrates was determined at 30 °C and pH 8.0. In brief, the activity towards TriC3:0 and TriC4:0 was determined using a pH indicator (Phenol Red®) assay [34,38,39]; for the other substrates activity was evaluated by the NEFA-Kit. For details …
	TriC3:0								TriC4:0
	Abs550nm/min (1)	Abs550nm/min (2)	Abs550nm/min (3)	Abs550nm/min average	S.D.	C.V.	V (U/g)	S.D.	Abs550nm/min (1)	Abs550nm/min (2)	Abs550nm/min (3)	Abs550nm/min average	S.D.	C.V.	V (U/g)	S.D.
WP_075743487.1	0.2231	0.1766	0.2003	0.2	0.0232515	11.6257	16662.7	1937.16	0.0643	0.0751	0.0911	0.0768333	0.0134838	17.5494	6401.26	1123.39
WP_075743487.1lid	0.1171	0.1226	0.123	0.1209	0.00329697	2.72702	629.538	17.1676	0.1497	0.1628	0.1373	0.149933	0.0127516	8.50485	780.718	66.3989
WP_075743487.1W89M/L60F	0.1205	0.1002	0.0979	0.1062	0.0124374	11.7113	552.994	64.763	0.1239	0.1203	0.1234	0.122533	0.00195021	1.59158	638.043	10.155
Addzyme RD	0.1284	0.0987	0.1146	0.1139	0.0148624	13.0486	593.089	77.3898	0.2279	0.1944	0.1999	0.2074	0.0179652	8.66212	1079.95	93.5468
	Abs550nm																					Abs550nm
	TriC3:0										TriC4:0											TriC3:0			TriC4:0
Time (min)	Control	WP_075743487.1lid			WP_075743487.1W89M/L60F			Addzyme RD			Control	WP_075743487.1lid			WP_075743487.1W89M/L60F			Addzyme RD			Time (min)	WP_075743487.1			WP_075743487.1
0	3.481	2.838	2.848	2.88	3.029	2.869	2.991	2.975	2.647	2.846	3.608	3.092	2.957	2.833	2.875	2.88	2.933	2.878	2.932	3.002	0	3.288	3.12	3.063	3.249	3.275	3.341
1	3.466	2.631	2.66	2.731	2.802	2.735	2.844	2.873	2.629	2.823	3.615	2.989	2.82	2.674	2.691	2.615	2.728	2.828	2.846	2.989	0.5	3.148	2.971	2.886	3.19	3.211	3.261
2	3.458	2.487	2.482	2.548	2.631	2.614	2.756	2.808	2.573	2.761	3.615	2.728	2.554	2.485	2.525	2.413	2.587	2.648	2.658	2.91	1	3.017	2.864	2.696	3.139	3.139	3.213
3	3.483	2.34	2.331	2.378	2.544	2.51	2.655	2.711	2.48	2.671	3.652	2.54	2.355	2.328	2.381	2.276	2.441	2.446	2.421	2.751	1.5	2.888	2.75	2.529	3.088	3.084	3.166
4	3.45	2.214	2.187	2.222	2.418	2.402	2.554	2.616	2.38	2.557	3.597	2.401	2.188	2.178	2.247	2.155	2.312	2.166	2.199	2.512	2	2.751	2.644	2.404	3.04	3.033	3.126
5	3.449	2.107	2.059	2.087	2.299	2.31	2.449	2.494	2.275	2.443	3.638	2.256	2.032	2.044	2.139	2.088	2.206	1.889	2.013	2.244	2.5	2.645	2.559	2.296	3.006	2.991	3.08
6	3.439	2.017	1.938	1.969	2.176	2.206	2.358	2.379	2.165	2.327	3.667	2.121	1.885	1.917	2.035	1.995	2.094	1.641	1.831	2.02	3	2.538	2.502	2.208	2.981	2.949	3.034
7	3.442	1.944	1.841	1.879	2.066	2.106	2.266	2.157	2.067	2.202	3.653	1.995	1.743	1.805	1.951	1.918	2.009	1.389	1.644	1.825	3.5	2.431	2.419	2.112	2.952	2.921	2.995
8	3.444	1.849	1.764	1.808	1.963	2.015	2.176	1.968	1.974	1.992	3.607	1.872	1.62	1.697	1.877	1.855	1.927	1.225	1.46	1.645	4	2.32	2.345	2.043	2.916	2.892	2.946
9	3.435	1.719	1.69	1.738	1.862	1.938	2.082	1.814	1.815	1.874	3.643	1.779	1.531	1.606	1.843	1.791	1.873	1.137	1.309	1.525	4.5	2.203	2.255	1.959	2.898	2.87	2.909
10	3.447	1.571	1.603	1.662	1.77	1.863	1.989	1.771	1.695	1.778	3.663	1.685	1.47	1.521	1.738	1.725	1.797	1.087	1.232	1.441	5	2.097	2.159	1.876	2.874	2.836	2.865
																					5.5	1.997	2.061	1.793	2.851	2.809	2.814
																					6	1.897	1.976	1.714	2.828	2.783	2.771
																					6.5	1.802	1.911	1.645	2.8	2.748	2.721
																					7	1.726	1.841	1.588	2.767	2.708	2.672
																					7.5	1.691	1.768	1.543	2.734	2.672	2.619
																					8	1.655	1.718	1.509	2.702	2.637	2.581
																					8.5	1.617	1.672	1.486	2.663	2.599	2.528
																					9	1.596	1.62	1.461	2.621	2.55	2.482
																					9.5	1.581	1.563	1.442	2.581	2.502	2.438
																					10	1.561	1.513	1.429	2.547	2.455	2.384
	Control	WP_075743487.1				WP_075743487.1lid				WP_075743487.1W89M/L60F				Addzyme RD
	Abs550nm	Abs550nm (1)	Abs550nm (2)	V (U/g)	S.D.	Abs550nm (1)	Abs550nm (2)	V (U/g)	S.D.	Abs550nm (1)	Abs550nm (2)	V (U/g)	S.D.	Abs550nm (1)	Abs550nm (2)	V (U/g)	S.D.
TriC8:0	0.071	0.203		1570.31		0.261	0.272	2325.72	92.5312	1.214	1.249	13805.6	294.418	1.204	1.197	13436.8	58.8835
TriC10:0	0.066	0.115		582.917		0.256	0.249	2218.65	58.8835	0.822	0.86	9219.61	319.653	0.91	0.868	9850.11	353.301
Olive oil	0.375	0.38		59.4813		0.476	0.478	1213.42	16.8239	0.535	0.51	1754.7	210.298	0.689	0.721	3675.95	269.182
Palm oil	0.057	0.057		0		0.153	0.178	1290.74	210.298	0.146	0.144	1046.87	16.8239	0.178	0.148	1296.69	252.358
Coconut oil	0.057	0.061		47.5851		0.17	0.19	1463.24	168.239	0.191	0.235	1855.82	370.125	0.719	0.506	6632.17	1791.74
